# Supplementary material
Source: PubMed Central journal article supplement (PMC7528945)
Supplement: mmc1.pdf [file mmc1.pdf]

**Cell Host & Microbe, Volume 28**

**Supplemental Information**

**Accelerated Preclinical Paths to Support**

**Rapid Development of COVID-19 Therapeutics**

**Jay A. Grobler, Annaliesa S. Anderson, Prabhavathi Fernandes, Michael S. Diamond, Christine M. Colvis, Joseph P. Menetski, Rosa M. Alvarez, John A.T. Young, and Kara L. Carter**

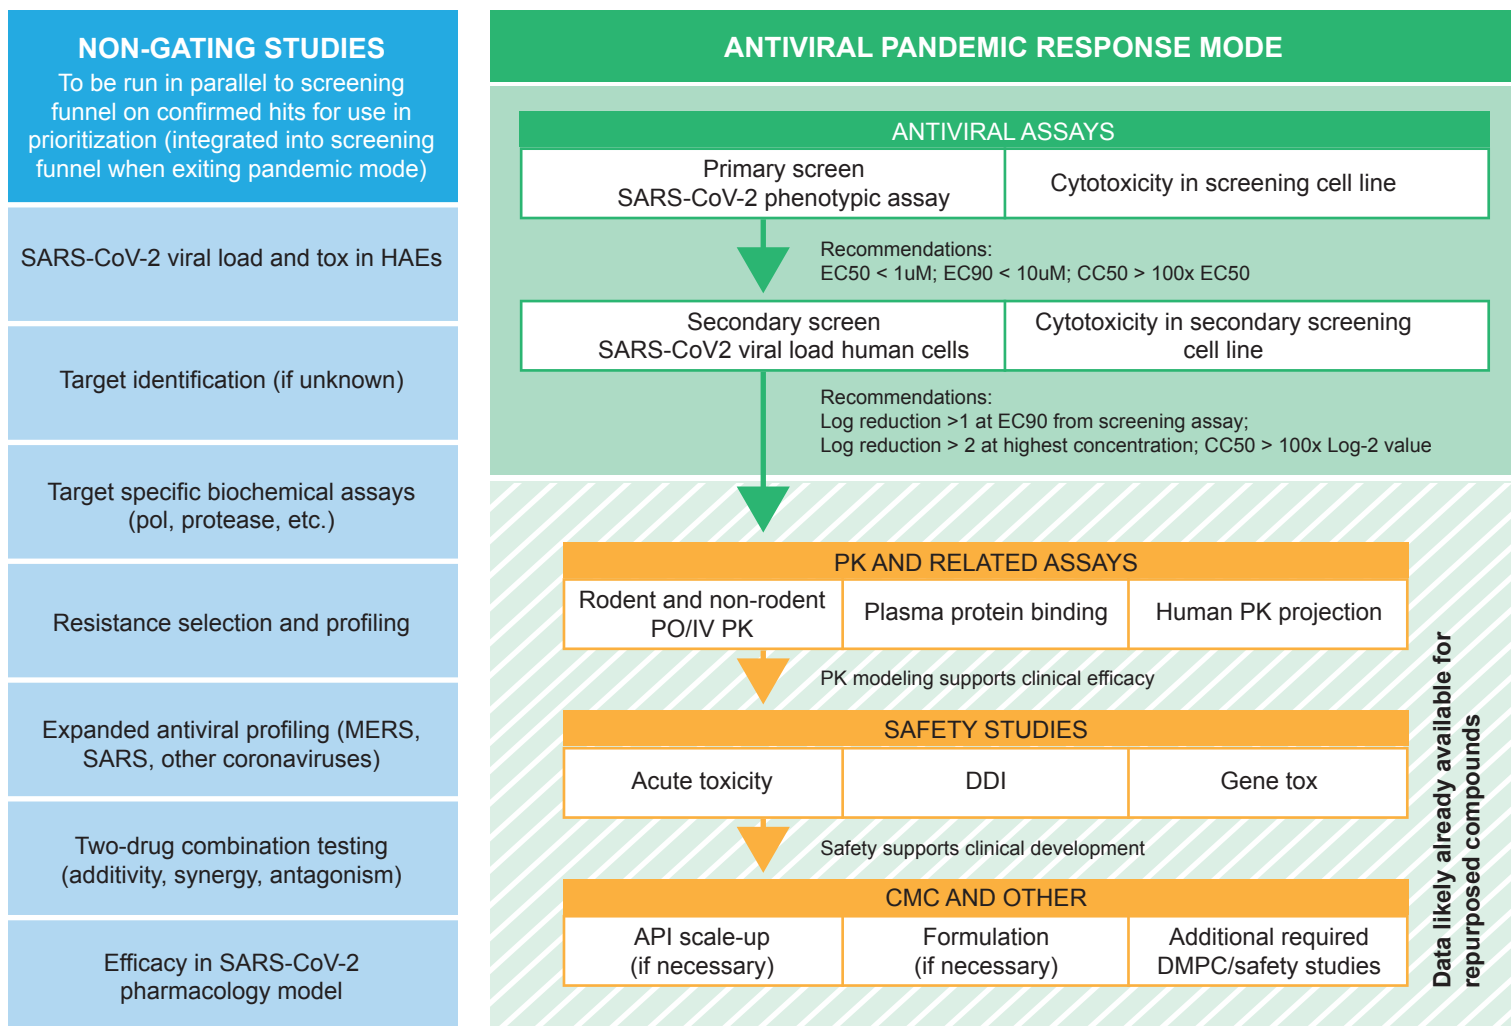

Supplemental Figure 1. Detailed blueprint for pandemic response mode for antivirals for COVID-19. Related to Figure 3, and “blueprint for antivirals”.

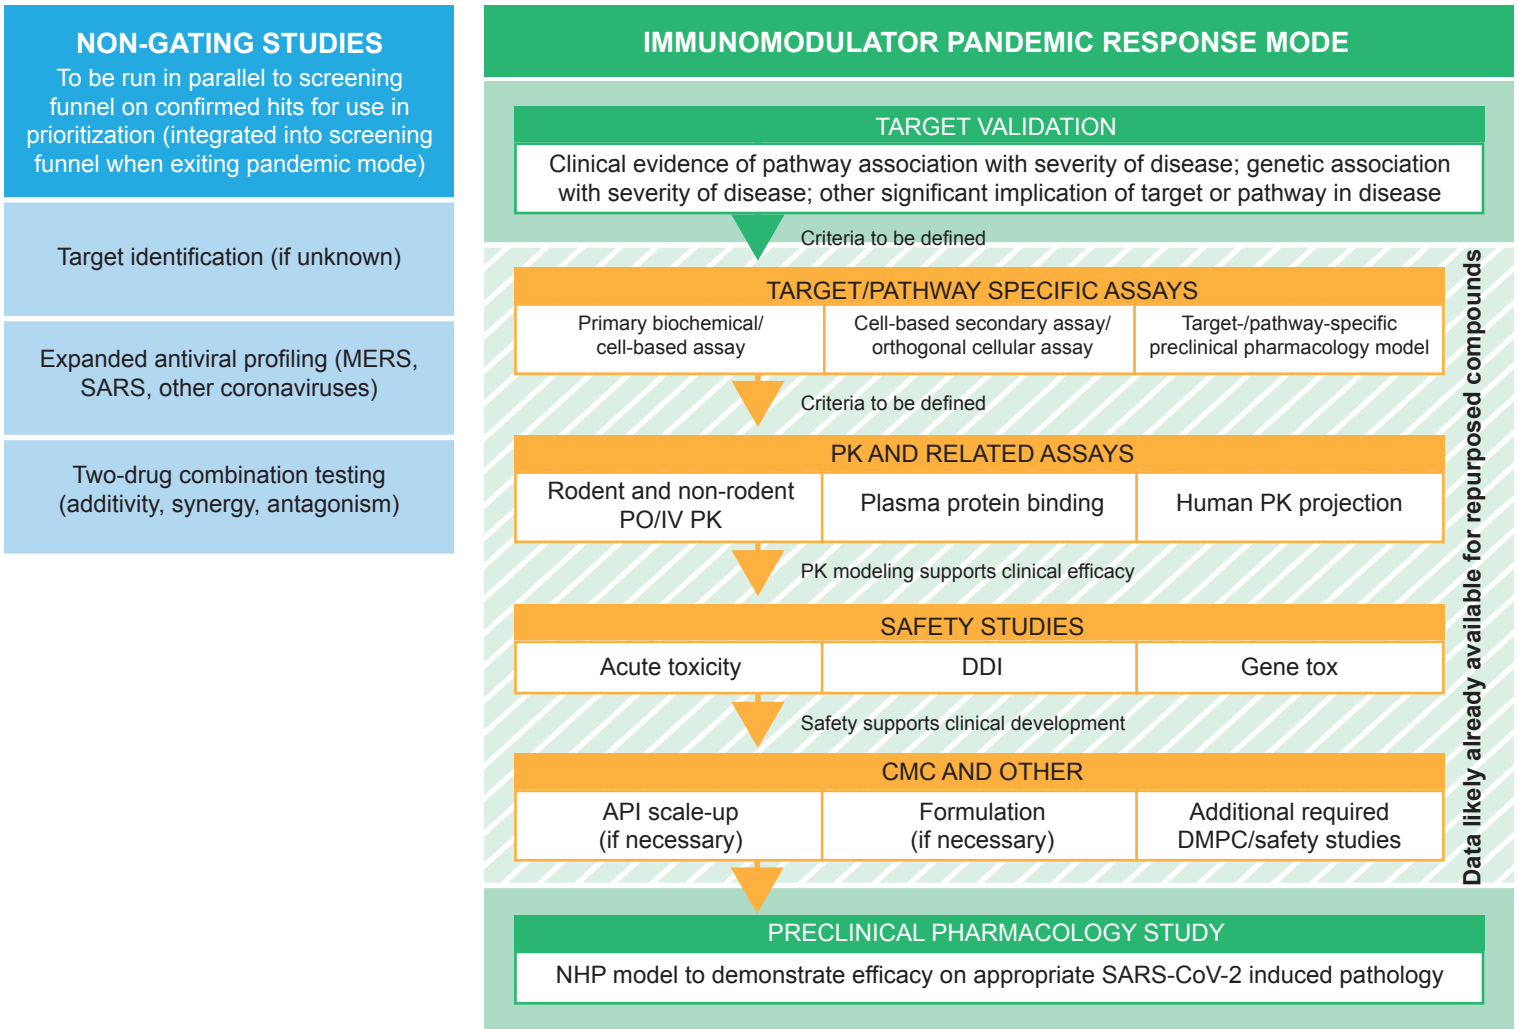

Supplemental Figure 2. Detailed blueprint for pandemic response mode for immunomodulators for COVID-19. Related to Figure 3 and “Blueprint for immunomodulators”.

|                                                                                                                                                                                                                                                  |
|--------------------------------------------------------------------------------------------------------------------------------------------------------------------------------------------------------------------------------------------------|
| <p><b>NON-GATING STUDIES</b></p> <p>To be run in parallel to screening funnel on confirmed hits for use in prioritization (integrated into screening funnel when exiting pandemic mode)</p>                                                      |
| <p>Target identification (if unknown)</p>                                                                                                                                                                                                        |
| <p>Demonstrate either superior efficacy and safety or equivalent efficacy and improved safety compared with existing agents.</p>                                                                                                                 |
| <p>Expanded profiling (MERS, SARS, other coronaviruses) (e.g. MASP2 serine protease inhibitors can block viral entry (TMPRSS2), complement activation in addition to coagulation factors. ACE2-CoV-2 mouse model if active <i>in vitro</i>).</p> |
| <p>Potential for drug interactions with anti-complement, antibiotics, antivirals, immunomodulators</p>                                                                                                                                           |

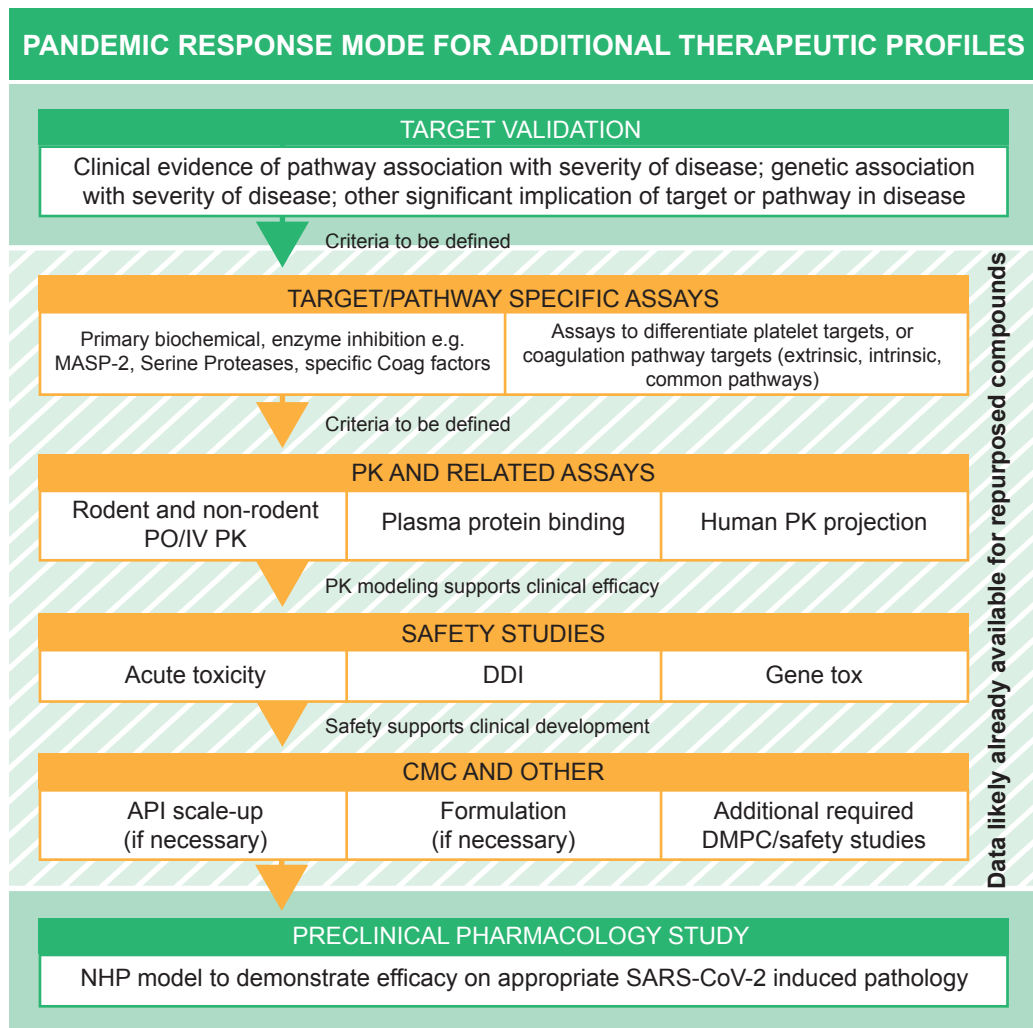

Supplemental Figure 3. Detailed blueprint for pandemic response mode for additional therapeutic profiles for COVID-19. Related to Additional Therapeutic Profile.
